# Supplementary material
Source: publisher figshare collection journal article supplement (https://future-science-group.figshare.com/articles/dataset/_/21261453)
Supplement: Supplementary file 1 [file 1]

| Supplementary table 5: perioperative comparison | |  |  |  |
| --- | --- | --- | --- | --- |
|  |  |  |  |  |
| TOTAL | Sufentanil flow chart | Sufentanil free use | p-value | test |
| N = 61 | N = 29 | N = 31 |  |  |
| T start to stop propofol (min) | 36:00 (36:30) | 37:00 (46:00) | 0.499 | M |
| T stop propofol to wake-up (min) | 12:00 (08:00) | 13:30 (06:30) | 0.927 | T |
|  |  |  |  |  |
| temp °C | 36.0 (0.43) | 36.0 (0.43) | 0.734 | T |
| SpO2 % | 98 (1.9 | 99 (0.82) | 0.245 | M |
| Neurowave | 48 (7.0) | 45 (8.7) | 0.199 | M |
|  |  |  |  |  |
|  | N = 30 | N = 31 |  |  |
| Paracetamol % | 30 (100%) | 30 (97%) | >0.999 | C |
| NSAID % | 26 (87%) | 25 (81%) | 0.731 | C |
| Contramal % | 6 (20%) | 3 (10%) | 0.301 | C |
| Morfine % | 0 (0%) | 0 (0%) | >0.999 | C |
| Wound infiltration % | 9 (30%) | 11 (36%) | 0.786 | C |
|  |  |  |  |  |
| Dexamethasone % | 19 (63%) | 21 (68%) | 0.791 | C |
| Ondansetron % | 4 (13%) | 7 (23%) | 0.508 | C |
| DHBP / alizapride post last measurement | 4 (13%) | 4 (13%) | >0.999 | C |
|  |  |  |  |  |
| dosis sufentanil (µcg) | 20.1 (10.0) | 14.8 (5.0) | **0.017** | M |

T = t-test, M = Mann-Whitney U, C = Pearson Chi-Square
